# Supplementary material for: Overcoming chemo/radio-resistance of pancreatic cancer by inhibiting STAT3 signaling
Source: PubMed Central journal article supplement (PMC4905505; doi:10.18632/oncotarget.7336), 2016-02-12
Supplement: oncotarget-07-11708-s001.pdf [file oncotarget-07-11708-s001.pdf]

## Overcoming chemo/radio-resistance of pancreatic cancer by inhibiting STAT3 signaling

### Supplementary Materials

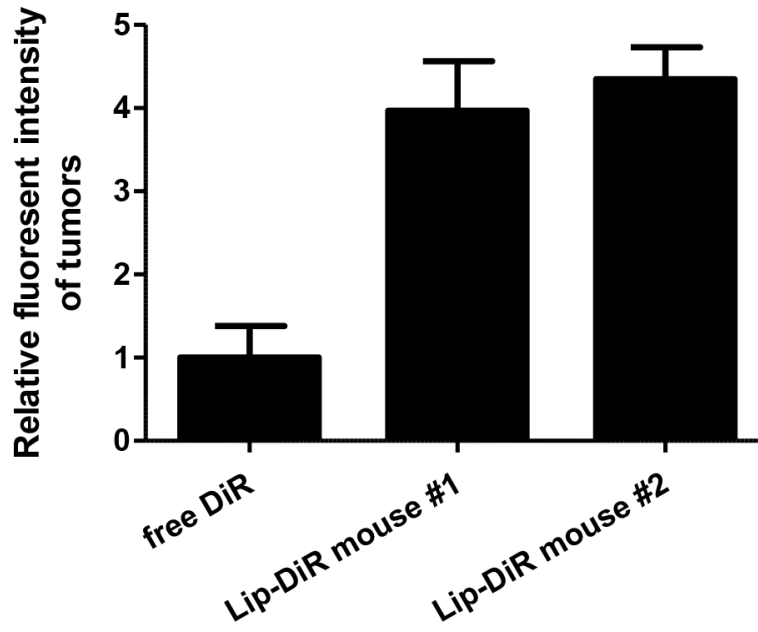

Supplementary Figure S1: Relative fluorescence intensity in tumors received free DiR or liposomal DiR, DiR signal is accumulated to about four folds in tumors given Liposome formulation comparing to free DiR.

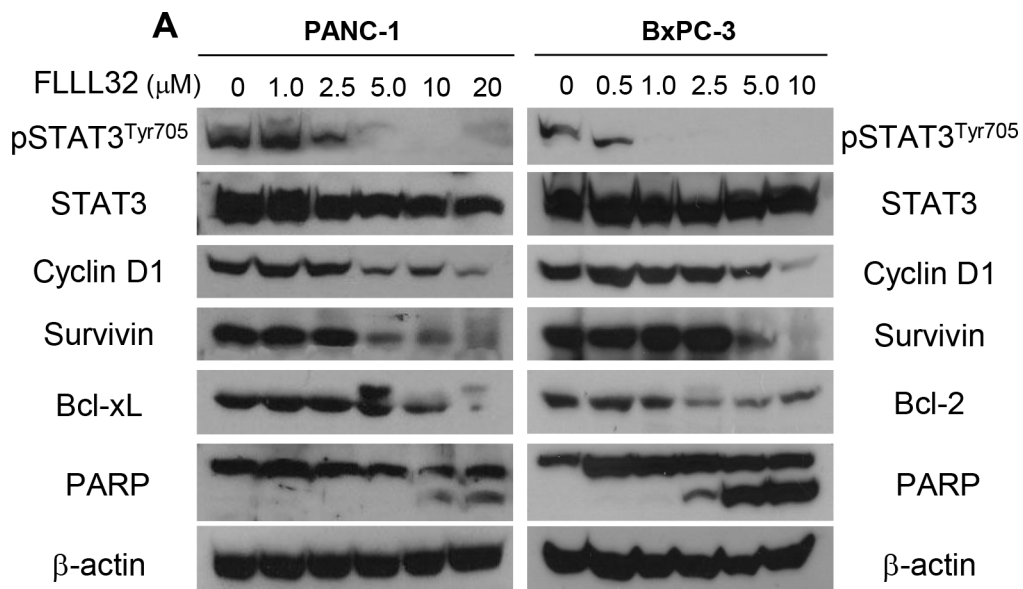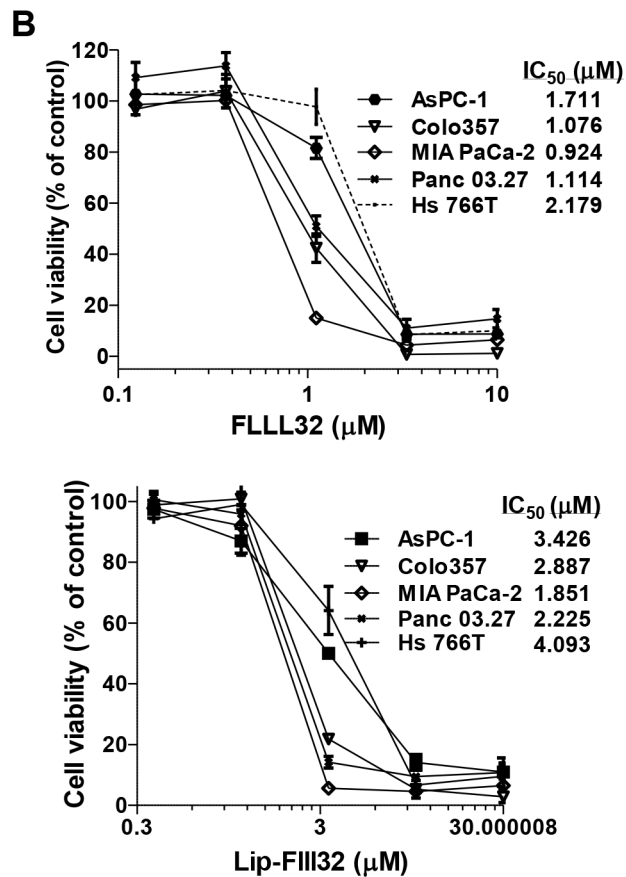

**Supplementary Figure S2:** (A) Western blot analysis of STAT3 and its target proteins in FLLL32 treated PANC-1 (left) and BxPC-3 cells (right) at different doses for 24 hours. FLLL32 dose dependently inhibits pSTAT3 and down-stream proteins. (B). The MTT-based cytotoxicity analysis of FLLL32 and Lip-FLLL32 against a panel of pancreatic cell lines.

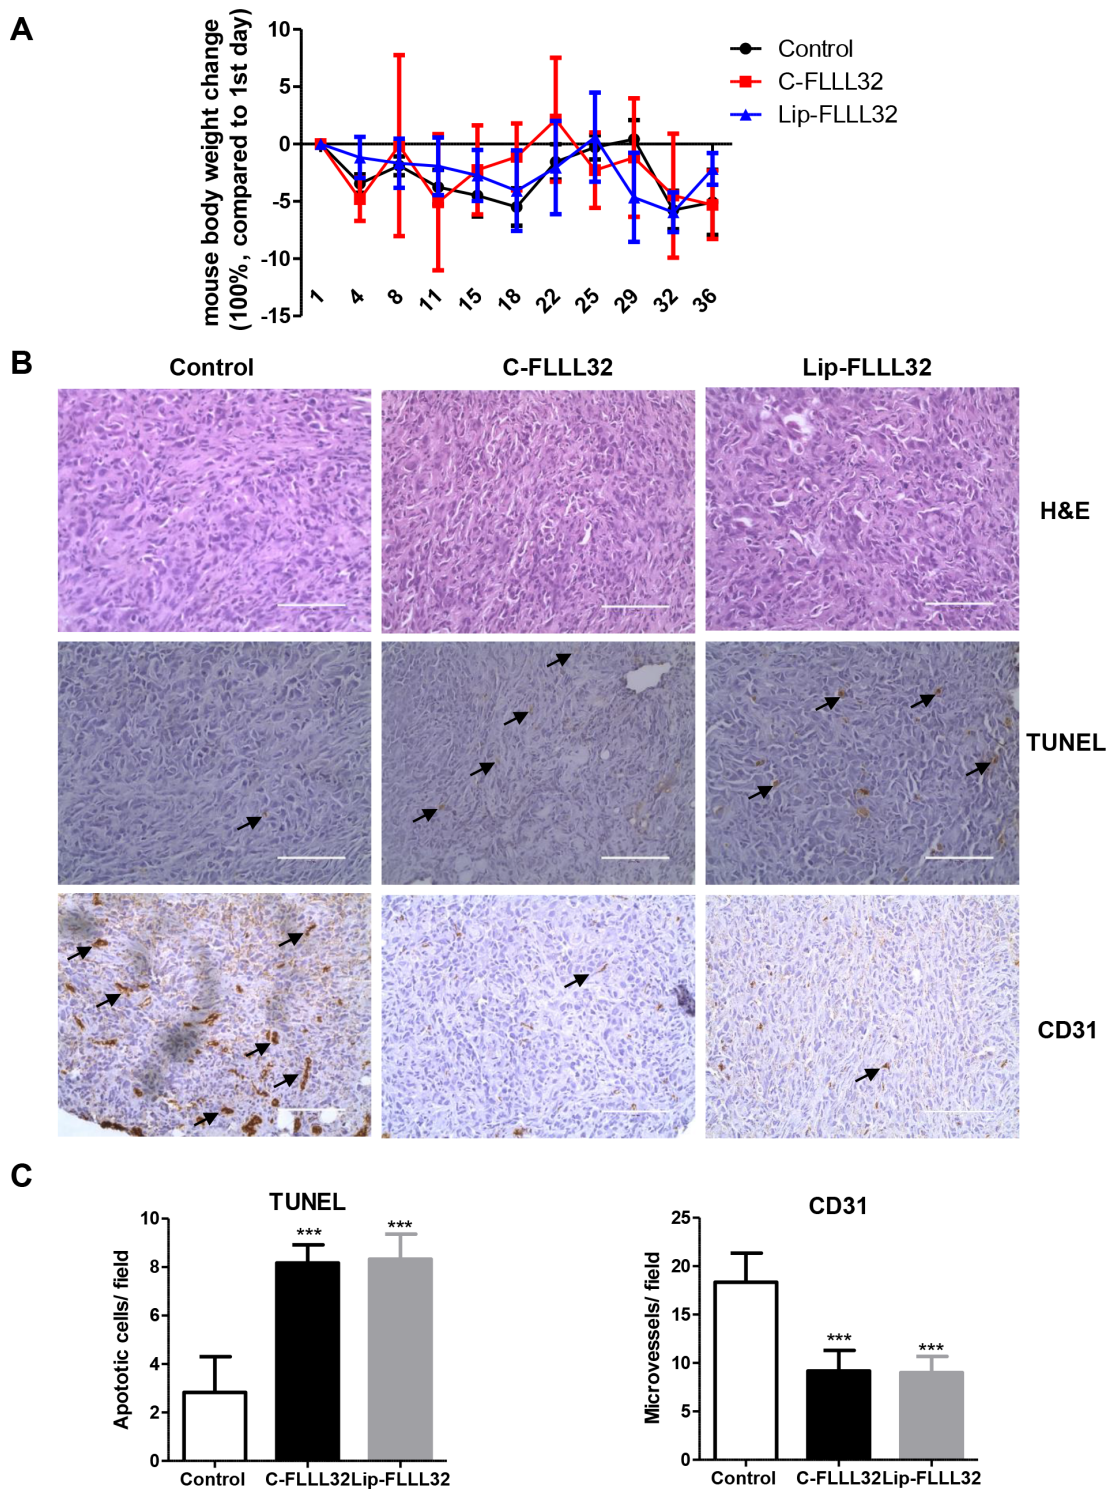

**Supplementary Figure S3:** (A) Average body weight change of mice receiving 15 mg/kg Cremophor formulated FLLL32 or 15 mg/kg liposome formulated FLLL32, or left untreated during experimental duration. (B–C) Immunohistologic analysis of tumor tissues. One tumor from each group was taken at the end of treatment, fixed with 4% formaldehyde and processed for H & E staining, TUNEL staining and CD31 immunostaining. (B) Representative pictures (Bar: 100  $\mu$ m. Magnification: 400X). In TUNEL assay, apoptotic cells were stained with brown nuclei (arrows). In CD31 staining, tumor blood vessels were stained brown (arrows). (C) TUNEL-positive cells and CD31-positive endothelial cells were quantified by randomly counting six fields. Values are mean  $\pm$  SD ( $n = 6$ , \*\*\* $P < 0.001$ , one-way ANOVA).

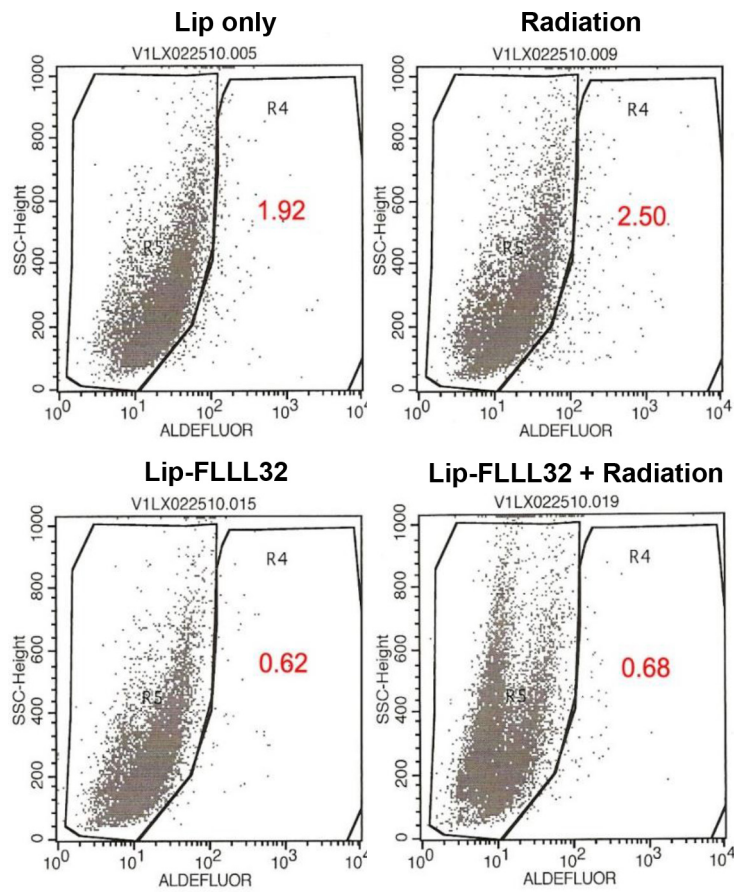

**Supplementary Figure S4: Representative diagrams of ALDEFLUOR assay by flow cytometry analysis of ALDH1<sup>+</sup> population in xenograft tumors from mice treated with Lip only, radiation, liposomal FLLL32, or their combination for one week as indicated in Figure 5C.**

**Supplementary Table S1: Correlation between nuclear pSTAT3 expression and the clinic-pathologic factors**

|                                      |                       | Low expression<br>(score ≤ 4) | High expression<br>(score > 4) | <i>P</i>     |
|--------------------------------------|-----------------------|-------------------------------|--------------------------------|--------------|
| Age<br>( <i>n</i> = 155)             | ≤ 60 (y)              | 43                            | 45                             | 0.816        |
|                                      | > 60 (y)              | 34                            | 33                             |              |
| Gender<br>( <i>n</i> = 156)          | Male                  | 43                            | 55                             | 0.075        |
|                                      | Female                | 34                            | 24                             |              |
| Tumor type<br>( <i>n</i> = 155)      | Duct adenocarcinoma   | 76                            | 63                             | <b>0.037</b> |
|                                      | Glandular cancer      | 6                             | 15                             |              |
| Tumor size<br>( <i>n</i> = 156)      | ≤ 3 (cm)              | 25                            | 52                             | 0.695        |
|                                      | > 3 (cm)              | 28                            | 51                             |              |
| Tumor grade<br>( <i>n</i> = 149)     | I + II                | 65                            | 48                             | <b>0.011</b> |
|                                      | III                   | 12                            | 24                             |              |
| Tumor location<br>( <i>n</i> = 146)  | Head of pancreas      | 50                            | 55                             | 0.236        |
|                                      | Body/Tail of pancreas | 24                            | 17                             |              |
| T stage<br>( <i>n</i> = 155)         | T1 + T2               | 61                            | 67                             | 0.456        |
|                                      | T3                    | 15                            | 12                             |              |
| N stage<br>( <i>n</i> = 141)         | 0                     | 36                            | 42                             | 0.718        |
|                                      | ≥ 1                   | 31                            | 32                             |              |
| AJCC stage<br>( <i>n</i> = 156)      | 1                     | 29                            | 35                             | 0.399        |
|                                      | 2 + 3                 | 48                            | 44                             |              |
| Patient survival<br>( <i>n</i> = 79) | Live                  | 15                            | 8                              | 0.169        |
|                                      | Dead                  | 27                            | 29                             |              |
| Smoking<br>( <i>n</i> = 142)         | no                    | 44                            | 45                             | 0.632        |
|                                      | yes                   | 24                            | 29                             |              |
| Drinking<br>( <i>n</i> = 140)        | no                    | 46                            | 49                             | 0.846        |
|                                      | yes                   | 21                            | 24                             |              |

**Supplementary Table S2: Maximal tolerated dose study**

| Dose<br>(mg/kg) | Mice status                  |          |
|-----------------|------------------------------|----------|
|                 | Cremophor® EL<br>and ethanol | Liposome |
| 10              | Good                         | Good     |
| 15              | Good                         | Good     |
| 22.5            | Bad                          | Good     |
